# Supplementary material
Source: Springer Nature journal article supplement (https://www.springermedizin.de/resource/supplementary/12911_2013_754_MOESM2_ESM.pdf/9526590)
Supplement: MOESM2 [file 9526590]

## Appendix 2.

### Review I: Relationships between Health Literacy and Values Clarity/Decision Confidence

| Authors, Year, Study Design, Sample Size              | Population and Setting, Health Literacy or Education Level                                                                                                                                | Variables Used in Multivariate Analysis              | Outcome Measure & Results By Health Literacy Skill Level                                              | Differences in Results Between Health Literacy Skill Levels                                                                                                               |
|-------------------------------------------------------|-------------------------------------------------------------------------------------------------------------------------------------------------------------------------------------------|------------------------------------------------------|-------------------------------------------------------------------------------------------------------|---------------------------------------------------------------------------------------------------------------------------------------------------------------------------|
| Hawley et al., 2008 [1]<br>Cross-sectional<br>N = 877 | Breast cancer patients from Los Angeles SEER registry making a decision about surgical treatment.<br><br>Subjective health literacy questions adapted from Chew: Lowest tertile -- 12%    | Race/ethnicity<br>Age<br>Education<br>Marital status | Decision Regret<br><br>Not reported by literacy level                                                 | Decision Regret (low vs. high health literacy):<br>Odds ratio 3.5 (1.8 to 7.1)<br><br>Decision Regret (moderate vs. high health literacy):<br>Odds ratio 2.1 (1.4 to 3.1) |
| Martin, 2008 [2]<br>Cross-sectional<br>N = 628        | Patients from 5 community rheumatology clinics making a decision about rheumatoid arthritis treatment.<br><br>Objective numeracy (4 questions) from DMARD Knowledge profile: Not reported | None                                                 | Decision Confidence measured by sub-index of COMRADE instrument<br><br>Not reported by numeracy level | Decision Confidence:<br>Pearson correlation 0.07; <i>p</i> not significant                                                                                                |
| Sudore, 2010 [3]<br>Cross-sectional<br>N = 205        | Multiethnic general medicine outpatients at a county hospital                                                                                                                             | Age<br>Gender<br>Education                           | % participants reporting Decision Uncertainty on single question:                                     | Adjusted odds ratio of reporting decision uncertainty (inadequate/marginal versus adequate): 2.11 (1.03 to 4.33)                                                          |

|                                                |                                                                                                                                                                                                       |                                                                           |                                                                                                                             |
|------------------------------------------------|-------------------------------------------------------------------------------------------------------------------------------------------------------------------------------------------------------|---------------------------------------------------------------------------|-----------------------------------------------------------------------------------------------------------------------------|
|                                                | making a decision about life support                                                                                                                                                                  | Health Status                                                             |                                                                                                                             |
|                                                | Functional health literacy on S-TOHFLA:<br>Inadequate: 22%<br>Marginal: 18%<br>Adequate: 60%                                                                                                          | Note: religiosity, trust, and prior experience not associated or included | Adequate health literacy: 34%<br>Marginal health literacy: 62%<br>Inadequate health literacy: 60%                           |
| Torres, 2009 [4]<br>Cross-sectional<br>N = 106 | 106 women recruited from a family clinic and making decisions about hormone replacement therapy.<br><br>Functional health literacy on S-TOFHFLA:<br>Inadequate: 46%<br>Marginal: 18%<br>Adequate: 36% | None                                                                      | Mean Decision Confidence by 11-item decision self-efficacy scale<br>Decision Confidence: Pearson correlation 0.70; p < 0.01 |

*Abbreviations Used:*

COMRADE: The Combined Outcome Measure for Risk Communication and Treatment Decision-Making Effectiveness

DMARD: Disease Modifying Anti-Rheumatic Drugs

SEER: Surveillance Epidemiology and End Results

S-TOFHFLA: Short-Test of Functional Health Literacy in Adults

**References**

1. Hawley ST, Janz NK, Hamilton A, Griggs JJ, Alderman AK, Mujahid M, Katz SJ: **Latina patient perspectives about informed treatment decision making for breast cancer.** *Patient Educ Couns* 2008, **73**:363-370.

2. Martin RW, Head AJ, Rene J, Swartz TJ, Fiechtner JJ, McIntosh BA, Holmes-Rovner M: **Patient decision-making related to antirheumatic drugs in rheumatoid arthritis: the importance of patient trust of physician.** *J Rheumatol* 2008, **35**:618-624.
3. Sudore RL, Schillinger D, Knight SJ, Fried TR: **Uncertainty about advance care planning treatment preferences among diverse older adults.** *J Health Commun* 2010, **159**(Suppl 2):159-171.
4. Torres RY, Marks R: **Relationships among health literacy, knowledge about hormone therapy, self-efficacy, and decision-making among postmenopausal health.** *J Health Commun* 2009, **14**:43-55.
